# Supplementary material
Source: PubMed Central journal article supplement (PMC6389761)
Supplement: Supp_Appendix1.pdf [file Supp_Appendix1.pdf]

Questionnaire Sustainability Survey 2017

| Question Number                    |                                                                           | Potential Answers                                                                                    |
|------------------------------------|---------------------------------------------------------------------------|------------------------------------------------------------------------------------------------------|
| Information about the participants |                                                                           |                                                                                                      |
| 1                                  | Which country is your biobank located in?                                 |                                                                                                      |
| 2                                  | What year was your biobank established?                                   |                                                                                                      |
| 3                                  | What type of organization are you working in?                             | Academic<br>commercial<br>pharma/ biotech<br>other                                                   |
| 4                                  | What type of biobank do you represent/manage?                             | Single disease oriented<br>Multiple disease oriented / broad scope<br>population biobank<br>other    |
| 5                                  | How many samples / aliquots do you have in your biobank inventory system? |                                                                                                      |
| 6                                  | Who has access to request samples form your biobank?                      | To own use only<br>To use within own organization<br>broad use, but not commercial<br>broad use, all |
| Business planning                  |                                                                           |                                                                                                      |
| 7                                  | Do you have a business plan for your biobank?                             | yes<br>no<br>in progress                                                                             |
| 8                                  | Is your business plan openly available?                                   | yes, internally<br>yes, on demand<br>yes, broadly<br>no<br>n.a.                                      |
| 9                                  | How often do you update your business plan?                               | periodically<br>as requested<br>not planned<br>n.a.                                                  |

Questionnaire Sustainability Survey 2017

| Size of your biobank and utilization |                                                                                                                                              |                                                                                                               |
|--------------------------------------|----------------------------------------------------------------------------------------------------------------------------------------------|---------------------------------------------------------------------------------------------------------------|
| 10                                   | Over the last few years, what is the average annual sample utilization / distribution rate (in %) of your total collections in your biobank? | ... %<br>unknown                                                                                              |
| 11                                   | What percentage of samples are reserved for future analysis or awaiting further data to define analysis?                                     | ... %<br>unknown                                                                                              |
| 12                                   | What is your target for sample utility (percentage of samples used/distributed of total samples)?                                            | .....%                                                                                                        |
| 13                                   | Did you plan for use of your samples and data before they were collected?                                                                    | yes<br>no<br>partial                                                                                          |
| Users / customers                    |                                                                                                                                              |                                                                                                               |
| 14                                   | Over the past few years, how many projects did your biobank provide samples/data annually (approx.)?                                         | xyz                                                                                                           |
| 15                                   |                                                                                                                                              | own use = xyz<br>within own organization = xyz<br>external, non-commercial = xyz<br>external commercial = xyz |
| 16                                   | Did you have repeat users/customers to your biobank in the last few years?                                                                   | yes<br>no                                                                                                     |
| 17                                   | Did you have specific customers for the samples in your biobank before you began collection?                                                 | yes<br>no<br>partial                                                                                          |
| Marketing / Advertising              |                                                                                                                                              |                                                                                                               |
| 18                                   | Does your biobank have a website?                                                                                                            | yes<br>name (voluntary):<br>no                                                                                |
| 19                                   | Are you actively marketing the samples and data in your biobank?                                                                             | yes, internal network only<br>yes broadly<br>no                                                               |
| 20                                   | Do you regularly communicate with your user / customer base (e.g. newsletter, email, etc.)?                                                  | yes, internal network only<br>yes broadly<br>no                                                               |

Questionnaire Sustainability Survey 2017

|                    |                                                                                                       |                            |
|--------------------|-------------------------------------------------------------------------------------------------------|----------------------------|
| 21                 | Do you have a strategy how to approach new users / customers (ideally written in your business plan)? | yes, internal network only |
|                    |                                                                                                       | yes broadly                |
|                    |                                                                                                       | no                         |
| 22                 | Is your biobank active in social media for marketing (e.g. Facebook, Twitter, LinkedIn etc.)?         | yes                        |
|                    |                                                                                                       | no                         |
| Cost recovery      |                                                                                                       |                            |
| 23                 | Are you employing cost recovery at your biobank?                                                      | yes                        |
|                    |                                                                                                       | no * please go to Q 31     |
| 24                 | If yes what is your aim in terms of percentage cost recovery?                                         | ... %                      |
|                    |                                                                                                       | no target                  |
| 25                 | What level of cost recovery are you currently operating at?                                           | .....%                     |
|                    |                                                                                                       | unknown                    |
| 26                 | Does the model include per sample costs?                                                              | yes                        |
|                    |                                                                                                       | no                         |
|                    |                                                                                                       | n.a.                       |
| 27                 | Do you also have service costs?                                                                       | yes                        |
|                    |                                                                                                       | no                         |
|                    |                                                                                                       | n.a.                       |
| 28                 | If you cost recover is this made clear to participants?                                               | yes                        |
|                    |                                                                                                       | no                         |
| 29                 | Are the costs for your recovery model openly available?                                               | yes                        |
|                    |                                                                                                       | no                         |
|                    |                                                                                                       | n.a.                       |
| 30                 | If so please select all costs that are available                                                      | per sample                 |
|                    |                                                                                                       | per data                   |
|                    |                                                                                                       | per service                |
|                    |                                                                                                       | others                     |
| Sources for income |                                                                                                       |                            |
| 31                 | Cost recovery                                                                                         | %                          |
| 32                 | Funding from host institution                                                                         | %                          |
| 33                 | Public funding                                                                                        | %                          |
| 34                 | Private funding, unrestricted                                                                         | %                          |

Questionnaire Sustainability Survey 2017

|                                                                                              |                                                               |                                                            |
|----------------------------------------------------------------------------------------------|---------------------------------------------------------------|------------------------------------------------------------|
| 35                                                                                           | Restricted funding, e.g. research grants                      | %                                                          |
| 36                                                                                           | Other sources for income                                      | %                                                          |
| Performance measures - which of the following performance measures are you assessed against? |                                                               |                                                            |
| 37                                                                                           | Is your biobank assessed against annual performance measures? | yes                                                        |
|                                                                                              |                                                               | no                                                         |
| 38                                                                                           | If so, select all measurements that are assessed?             | cost recovery                                              |
|                                                                                              |                                                               | sample utilization                                         |
|                                                                                              |                                                               | Number of samples collected                                |
|                                                                                              |                                                               | Number of samples sent out                                 |
|                                                                                              |                                                               | Sample quality                                             |
|                                                                                              |                                                               | Data quality                                               |
|                                                                                              |                                                               | Internal projects supported                                |
|                                                                                              |                                                               | External projects supported                                |
|                                                                                              |                                                               | Reference of resource in publications - no of publications |
| Other, please state                                                                          |                                                               |                                                            |
